# Supplementary material
Source: PubMed Central journal article supplement (PMC4350021)
Supplement: NIHMS659971-supplement-1.pdf [file NIHMS659971-supplement-1.pdf]

Cell Reports

Supplemental Information

**Human *C6orf211* Encodes Armt1, a Protein  
Carboxyl Methyltransferase that Targets PCNA  
and Is Linked to the DNA Damage Response**

J. Jefferson P. Perry, Gregory D. Ballard, Alexandra E. Albert, Lacey E. Dobrolecki,  
Linda H. Malkas, and Derek J. Hoelz







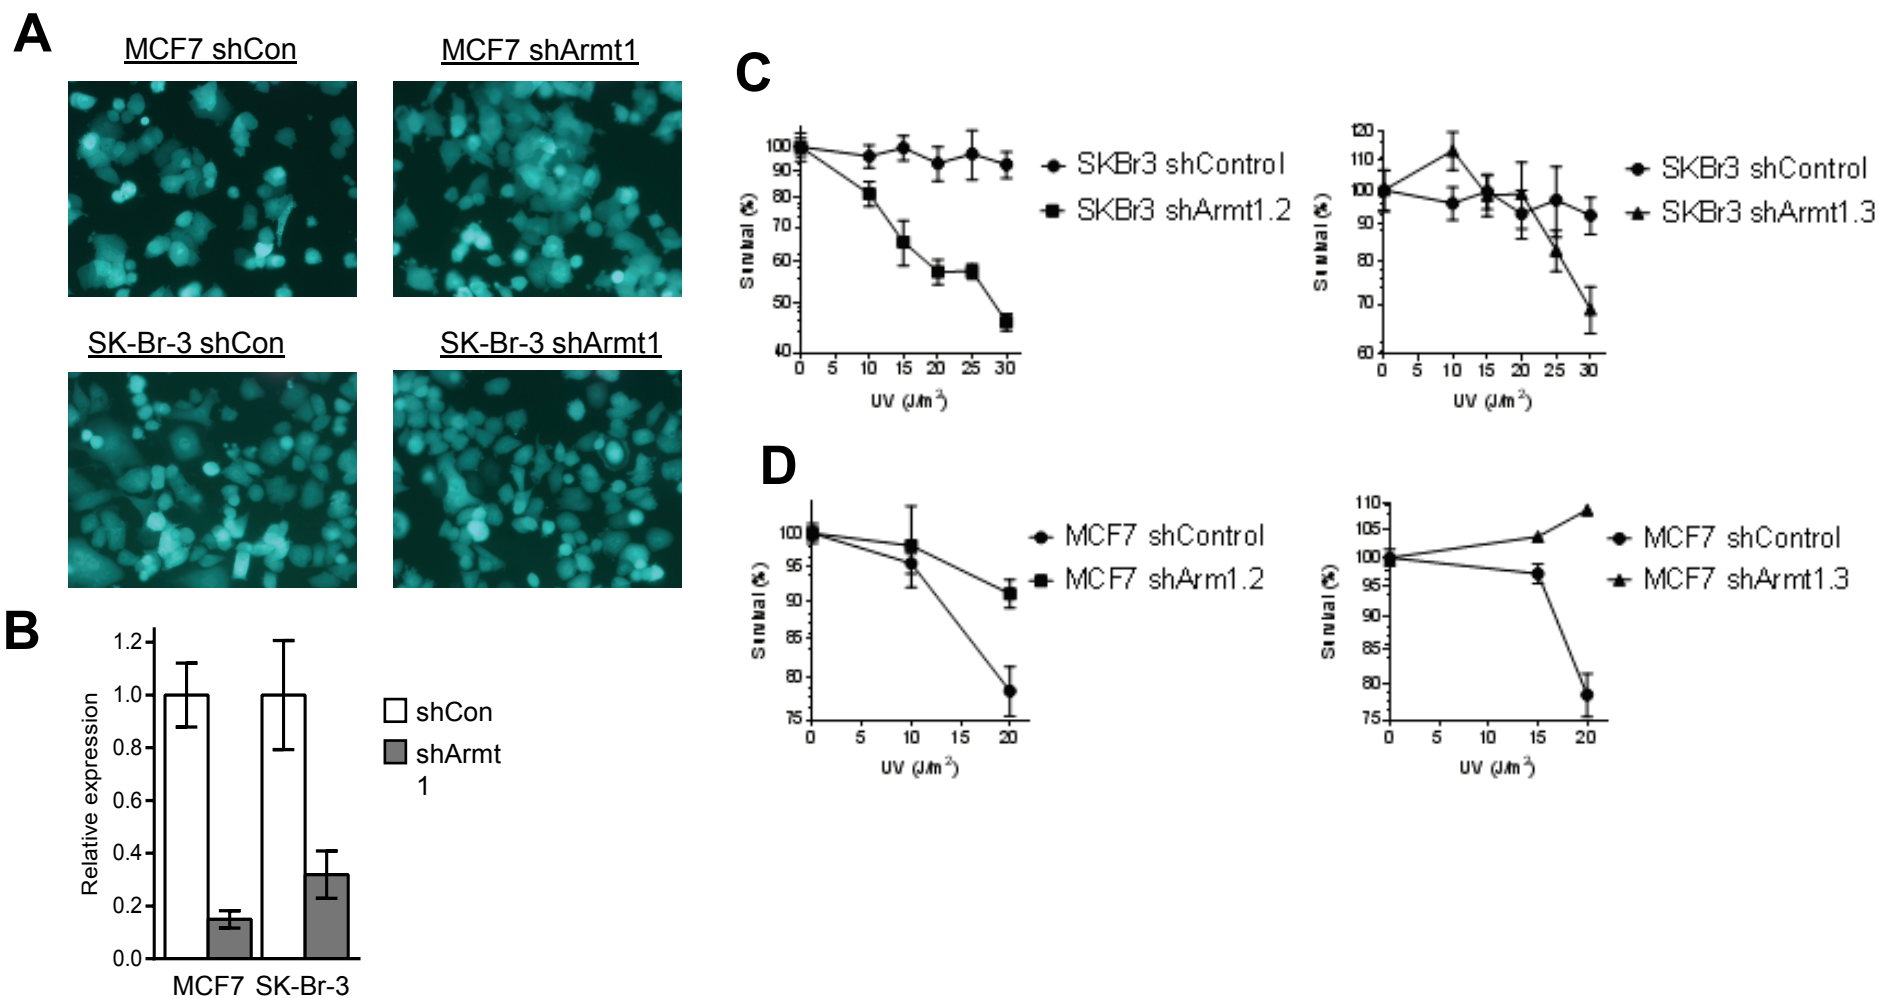

Figure S4 (related to Figure 5). (A) MCF7 and SK-Br-3 cells were infected with lentiviral particles expressing shRNA and TurboGFP from a bicistronic promoter, and stable clones selected with puromycin. Expression of TurboGFP was confirmed by microscopy. (B) Armt1 expression levels were determined by Q-PCR. Average mRNA expression levels were normalized to non-targeting controls and are presented  $\pm$  SD. MCF7 and SK-Br-3 cells were infected with lentiviral particles and clones stably expressing two alternative shRNA constructs (shArmt1.2, or shArmt1.3) were selected. SK-Br-3 cells (C) and MCF7 cells (D) expressing either control or Armt1 knockdown shRNA were exposed to increasing doses of UV radiation and survival assessed by clonogenic assays. Average colony numbers were normalized to the non-irradiated controls and are presented  $\pm$  SEM.
