# Supplementary material
Source: PubMed Central journal article supplement (PMC4350021)
Supplement: NIHMS659971-supplement-2.pdf [file NIHMS659971-supplement-2.pdf]

## Human *C6orf211* Encodes Armt1, a Protein Carboxyl Methyltransferase that Targets PCNA and Is Linked to the DNA Damage Response

### Graphical Abstract

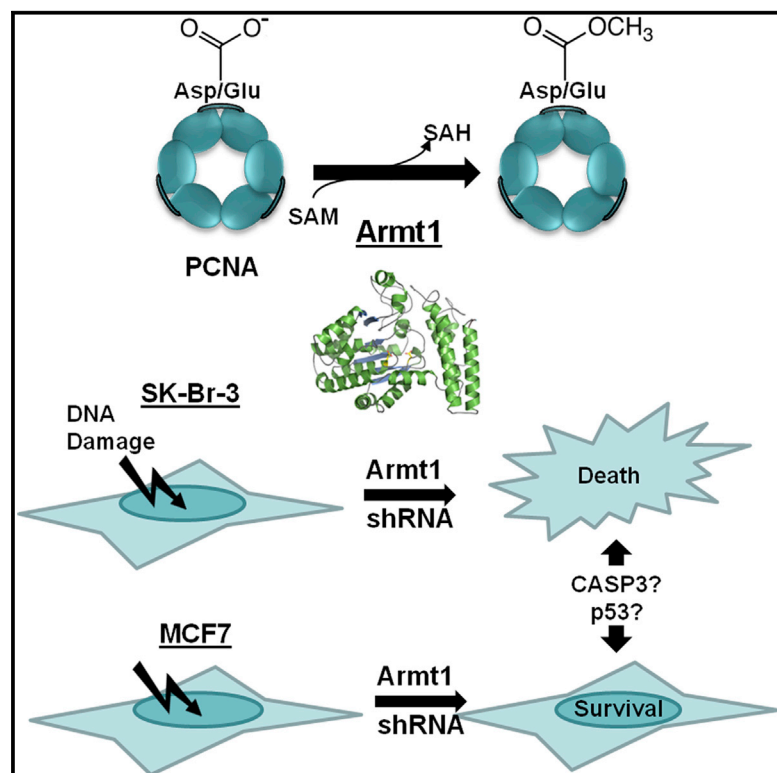

### Authors

J. Jefferson P. Perry,  
Gregory D. Ballard, ..., Linda H. Malkas,  
Derek J. Hoelz

### Correspondence

hoelzd@husson.edu

### In Brief

Methylation was previously identified on the DNA replication and repair factor PCNA. However, a eukaryotic enzyme capable of carboxyl side chain methylation of PCNA was unknown. Perry et al. identify Armt1 and find that it specifically methylates PCNA. Armt1 differentially regulates cancer cell survival in response to DNA damage.

### Highlights

- A SAM-dependent carboxyl methyltransferase specifically targets PCNA in human cells
- *C6orf211* encodes Armt1, a DUF89 protein family member of unknown function
- Armt1 is capable of methylating both itself and the DNA sliding clamp PCNA
- Armt1 plays differential roles in the DNA damage response of SK-Br-3 and MCF7 cells

# Human *C6orf211* Encodes Armt1, a Protein Carboxyl Methyltransferase that Targets PCNA and Is Linked to the DNA Damage Response

J. Jefferson P. Perry,<sup>1,2</sup> Gregory D. Ballard,<sup>3</sup> Alexandra E. Albert,<sup>3</sup> Lacey E. Dobrolecki,<sup>4</sup> Linda H. Malkas,<sup>4,5</sup> and Derek J. Hoelz<sup>3,4,6,7,\*</sup>

<sup>1</sup>Department of Biochemistry, University of California, Riverside, Riverside, CA 92521, USA

<sup>2</sup>School of Biotechnology, Amrita University, Kollam, Kerala 690525, India

<sup>3</sup>Maine Institute for Human Genetics and Health, Bangor, ME 04401, USA

<sup>4</sup>Department of Hematology and Oncology, Indiana University School of Medicine, Indianapolis, IN 46202, USA

<sup>5</sup>Present address: Department of Molecular and Cellular Biology, City of Hope, Duarte, CA 91010, USA

<sup>6</sup>Present address: Graduate School of Biomedical Sciences, University of Maine, Orono, ME 04469, USA

<sup>7</sup>Present address: Husson University School of Pharmacy, Bangor, ME 04401, USA

\*Correspondence: [hoelzd@husson.edu](mailto:hoelzd@husson.edu)

<http://dx.doi.org/10.1016/j.celrep.2015.01.054>

This is an open access article under the CC BY-NC-ND license (<http://creativecommons.org/licenses/by-nc-nd/3.0/>).

## SUMMARY

Recent evidence supports the presence of an L-glutamyl methyltransferase(s) in eukaryotic cells, but this enzyme class has been defined only in certain prokaryotic species. Here, we characterize the human *C6orf211* gene product as “acidic residue methyltransferase-1” (Armt1), an enzyme that specifically targets proliferating cell nuclear antigen (PCNA) in breast cancer cells, predominately methylating glutamate side chains. Armt1 homologs share structural similarities with the SAM-dependent methyltransferases, and negative regulation of activity by automethylation indicates a means for cellular control. Notably, shRNA-based knockdown of Armt1 expression in two breast cancer cell lines altered survival in response to genotoxic stress. Increased sensitivity to UV, adriamycin, and MMS was observed in SK-Br-3 cells, while in contrast, increased resistance to these agents was observed in MCF7 cells. Together, these results lay the foundation for defining the mechanism by which this post-translational modification operates in the DNA damage response (DDR).

## INTRODUCTION

Protein methyltransferases regulate important biological functions in eukaryotic cells through the post-translational modification (PTM) of a wide array of targets including, but not limited to, DNA damage response (DDR) mediators, DNA repair proteins, and transcription factors (Grillo and Colombatto, 2005). The majority of these enzymes catalyze transfer of methyl groups from the cofactor *s*-adenosyl methionine (SAM) to amine containing side chains of arginine or lysine generating a methylated residue

and the by-product *s*-adenosyl homocysteine (SAH). SAM-dependent methyltransferases (SAM-MTs) that methylate carboxylic acid groups also have been described in eukaryotic cells, and they too serve important biological roles.

Four classes of protein carboxyl methyltransferases (cSAM-MTs) have been described (Xie and Clarke, 1993). The protein iso-aspartate methyltransferases (PIMTs) are widespread throughout prokaryotes and eukaryotes, and these enzymes repair damaged or aging proteins. The substrates of PIMT are carboxyl groups of L-iso-aspartate or D-aspartate residues, which occur spontaneously in aging proteins. Two additional classes of cSAM-MTs are leucine carboxyl methyltransferase (LCMT) and isoprenylcysteine O-methyltransferase (ICMT). These enzymes are exclusive to eukaryotes, and their substrates are the carboxyl-terminal leucine in protein phosphatase 2A (Stanevich et al., 2011) and the carboxyl-terminal isoprenylated cysteine of membrane-associated proteins (Yang et al., 2011), respectively. The substrate of a fourth class of protein cSAM-MT is the carboxyl group of L-glutamate residues, but description of this type of enzyme has been limited to prokaryotic cells. Previously, we examined the post-translational state of a cancer-associated isoform of the DNA replication and repair factor proliferating cell nuclear antigen (PCNA) using liquid chromatography coupled to tandem mass spectrometry (LC-MS/MS) (Hoelz et al., 2006). By scrutinizing the MS/MS spectra from this isoform, we identified novel carboxyl methylation (methyl esters) on several glutamate and some aspartate residues. Since our observations, glutamyl methylation has been observed on the HIV-resistance protein X-DING-CD4 (Lesner et al., 2009), and aspartate and glutamate methylation has been identified and validated on ~2% of the HeLa cell proteome (Sprung et al., 2008). These findings provided compelling evidence for the existence of cSAM-MTs that target acidic residues in eukaryotic proteins and that methylation of acidic residues in PCNA may represent an unrecognized level of protein regulation in human cells.

Functionally, PCNA is essential protein and member of the DNA sliding clamp family of proteins (for reviews, see Moldovan

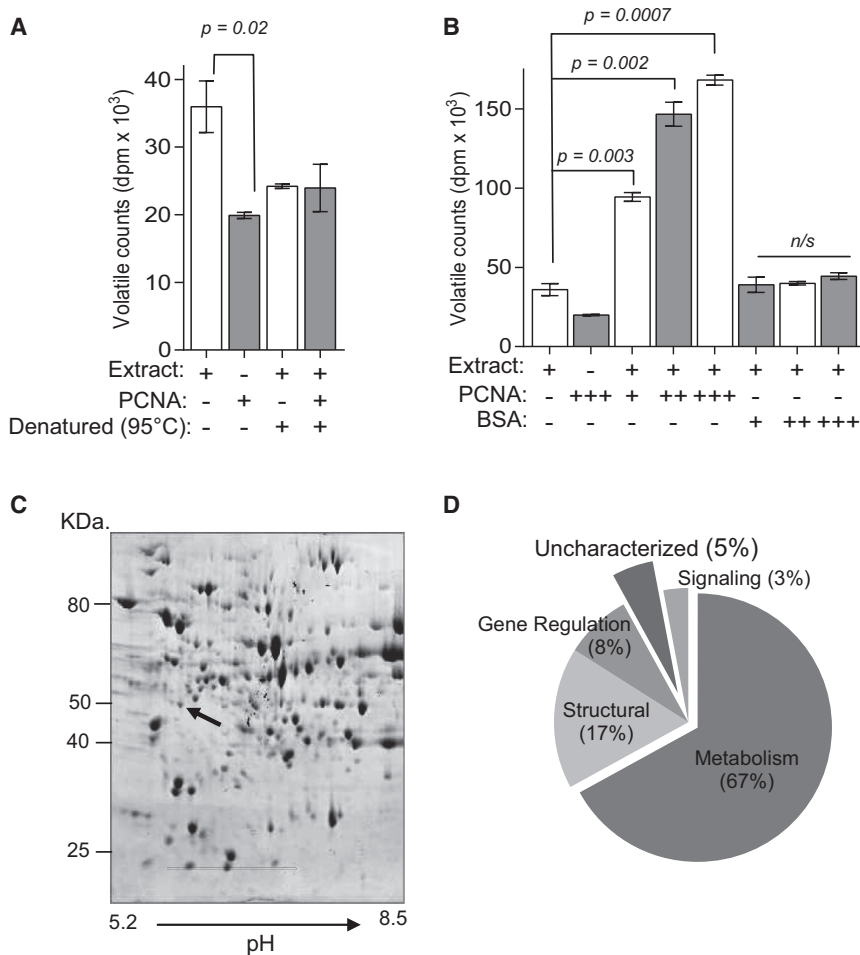

**Figure 1. A Carboxyl Methyltransferase Targets PCNA in Human Cells**

(A) MDA-MB-468 breast cancer cell extracts possess SAM-dependent carboxyl methyltransferase activities. Mean counts from vapor diffusion assays are presented  $\pm$  SD and compared using Student's *t* test.

(B) PCNA (2, 5, or 10  $\mu$ g) or BSA were added to breast cancer cell extracts and mean counts from vapor diffusion assay presented  $\pm$  SD and results compared using Student's *t* test.

(C) PCNA-dependent methyltransferase activity was enriched and resolved by 2D PAGE. The position of the *C6orf211* gene product in the gel is noted with an arrow.

(D) Proteins identified by LC-MS/MS in activity enriched fractions classified by cellular functions. See also Figure S1.

et al., 2007 and Stoimenov and Helleday, 2009). By tethering elements to the DNA, PCNA is required for DNA replication and DNA repair. A large and seemingly endless number of protein interactions have been observed with PCNA, which lends additional support for its function in cell cycle progression, chromatin maintenance, and programmed cell death. Interactions with PCNA therefore must be highly coordinated, and the PTM of PCNA is needed to control its functions within the cell. Ubiquitination and SUMOylation of PCNA have proven fundamental to regulation DNA damage tolerance (DDT) pathways (Hoege et al., 2002; Stelter and Ulrich, 2003). Monoubiquitination of PCNA in response to DNA damage anchors its interactions with the translesion (TLS) DNA polymerases in the error-prone branch of DDT. Interestingly, five eukaryotic TLS polymerases have been described that are capable of polymerizing (potentially incorrect) nucleotides on damaged template DNA, and the function of each polymerase appears specific to the type(s) of DNA damage encountered (Waters et al., 2009). The error-free branch of DDT requires K63-linked polyubiquitination and SUMOylation of PCNA, which supports a poorly understood template switching mechanism to bypass damage to template DNA. Phosphorylation of PCNA by the EGF receptor has also been described in breast cancer cells (Wang et al., 2006).

cancer cells linking its function to the DDR. Opposing survival phenotypes support a complex role for Armt1 in the DDR and indicate a dependence on a factor(s) that is differentially expressed between these two cell types. In addition to uncovering another level of protein regulation in eukaryotic cells, our identification of Armt1 uncovers a potentially powerful target to selectively kill cancer cells.

## RESULTS

### PCNA Is the Substrate of a Carboxyl Methyltransferase in Human Cells

Our previous identification of methylation on several acid residues in PCNA was surprising because a eukaryotic methyltransferase capable of catalyzing this reaction was unknown. To determine whether carboxyl methylation was an enzymatic phenomenon, we investigated breast cancer cell extracts for carboxyl methyltransferase activity (Figure 1A). Using a vapor diffusion assay, we were not only able to detect SAM-MT activity, but were also able to distinguish cSAM-MT activity (Murray and Clarke, 1984). After assaying extracts with <sup>3</sup>H-methyl-labeled SAM, the reactions were equilibrated with base and spotted onto filter paper placed in the neck of a scintillation

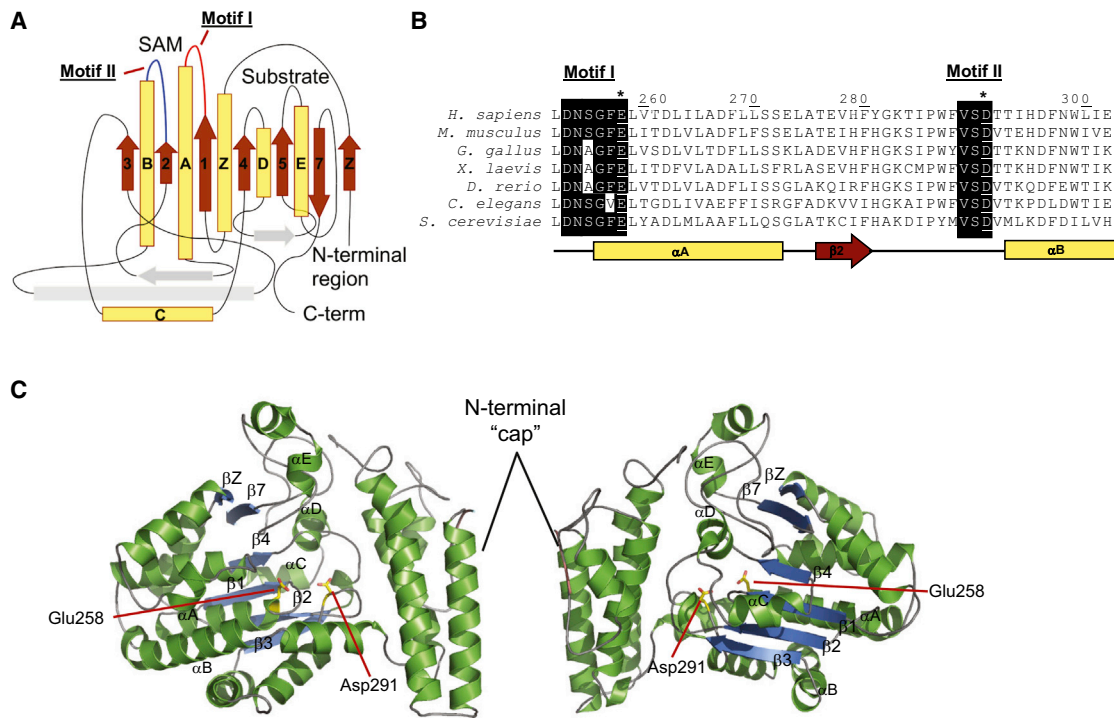

**Figure 2. The *C6orf211* Protein Possesses a SAM-Dependent Methyltransferase Fold**

(A) I-Tasser predicted folds of *C6orf211* suggest a SAM-MT fold.

(B) Alignment of *C6orf211* homologs identified conservation in predicted SAM binding site.

(C) Two 180° views of a threaded model of *C6orf211* based on PDB 3PT1 structure, central  $\beta$  sheets and  $\alpha$  helices of the SAM-MT core fold are labeled. Conserved active site glutamate 258 and aspartate 291 are highlighted as yellow sticks. Structural images were produced using PyMOL (<http://www.pymol.org>). See also [Figures S1](#) and [S2](#).

vial. Hydrolysis of carboxyl methylation then generates volatile methanol, which evaporates from the extracts and diffuses into scintillation fluid. The amount of radioactivity in the fluid is therefore proportional to cSAM-MT activity of the extracts. A small but significant amount of activity was observed when breast cancer cell extracts were assayed by vapor diffusion ([Figure 1A](#)). This activity was specific to the extracts and sensitive to heat denaturation, indicating the presence of cSAM-MT enzymes and substrates in the extracts. To investigate whether PCNA was a substrate for a cSAM-MT in breast cancer cells, we added increasing amounts of exogenous PCNA to the assays and examined its impact on activity ([Figure 1B](#)). As a result of PCNA addition, a large and dose-dependent increase in cSAM-MT activity was observed. When equivalent amounts of a nonspecific protein, BSA, were added to the assays, an increase in cSAM-MT activity was not observed. These data indicated that a cSAM-MT was present in human cell extracts and was capable of modifying acidic residues in PCNA.

### ***C6orf211* Encodes a DUF 89 Protein Containing a Conserved SAM-MT Structural Fold**

To identify the cSAM-MT responsible for modifying PCNA, we fractionated cell extracts and enriched for enzyme activity. Following protein precipitation with 30% ammonium sulfate, activity was further enriched by phenyl Sepharose chromatography.

Active fractions were then separated by gel filtration chromatography prior to other chromatographic steps. However, additional chromatographic attempts yielded no activity. This apparent loss of activity at steps of higher enrichment prevented us from isolating the enzyme to near homogeneity, so we closely examined enriched fractions displaying PCNA-directed cSAM-MT activity for the presence of a potential cSAM-MT. Individual polypeptides present in the active gel filtration fractions were separated by 2D PAGE, and the polypeptides present in the gel were subsequently excised, proteolytically digested, and identified by LC-MS/MS ([Figures 1C](#) and [1D](#)). Previously identified methyltransferases were not observed in the active fractions, so the identified proteins were classified according to their cellular function ([Figure 1D](#)). Aiding identification of the methyltransferase in question is that, in general and despite having high sequence divergence, SAM-MTs contain an evolutionarily conserved Rossmann-like structural fold. The Rossmann-like SAM-MT fold is composed of a core “ $\alpha$ - $\beta$ - $\alpha$ ” sandwich of six parallel  $\beta$  strands and a C-terminal antiparallel  $\beta$  strand, flanked by five  $\alpha$  helices, in addition to a variable N-terminal cap region ([Martin and McMillan, 2002](#)). Blast-based sequence alignments, together with secondary structure prediction and fold recognition using the I-TASSER server ([Zhang, 2008](#)), revealed that one isolate in the 2D PAGE gel ([Figure 1C](#)), the product of an uncharacterized human gene *C6orf211*, likely contained a SAM-MT fold ([Figure 2A](#)).





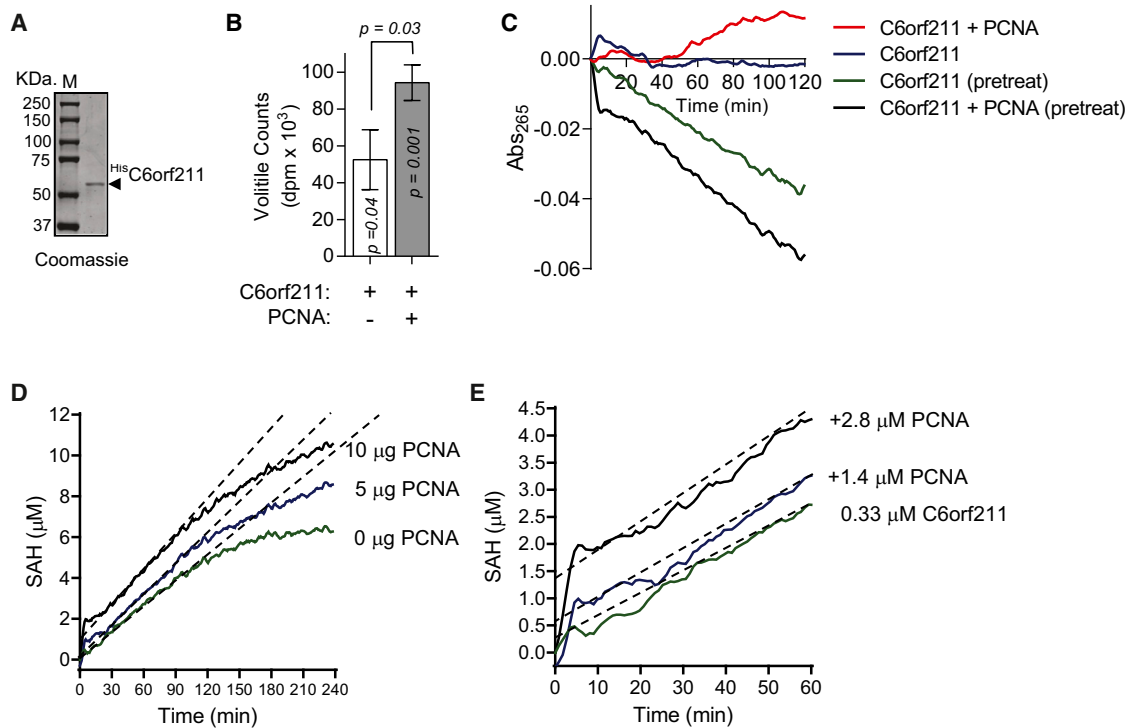

**Figure 4. C6orf211 Codes for Armt1, a Carboxyl Methyltransferase Capable of Modifying PCNA**

(A) Recombinant His-tagged C6orf211 was expressed in insect cells, isolated by Ni<sup>2+</sup> Sepharose chromatography prior to 10% SDS-PAGE and colloidal Coomassie blue staining.  
 (B) C6orf211 (0.2 μg) was assayed by vapor diffusion in absence and presence of PCNA (2 μg). Mean background (PCNA alone) subtracted counts are presented ± SD and comparisons made using Student's t test.  
 (C) Self methylation restricts activity; 2 μg of untreated C6orf211 or C6orf211 pretreated at 37°C for 90 min in the presence of 10 μM sinefungin were assayed for methyltransferase activity. Mean background (PCNA alone) subtracted absorbances from three replicate assays are presented.  
 (D) PCNA is a target of C6orf211 methyltransferase activity. Mean background (PCNA alone) subtracted activities from three independent assays in the absence and presence of increasing amounts of PCNA are presented.  
 (E) Pre-steady-state kinetics support an inhibitory role for Armt1 self-methylation.

C6orf211-like/DUF89 domain could instead be key to its poorly defined cellular function. As far as we are aware, this is the first prediction of structural and functional commonalities between C6orf211, the DUF89 protein family and methyltransferases that include the bacterial glutamyl cSAM-MT CheR.

### The Product of C6orf211, Armt1, Carboxyl Methylates PCNA

The identification of C6orf211 in protein fractions enriched for PCNA-dependent cSAM-MT activity and its structural similarities to the bacterial cSAM-MT CheR was intriguing because it supported a novel protein cSAM-MT function for this uncharacterized gene product. To establish the human *C6orf211* gene as encoding a cSAM-MT, we expressed, purified, and examined the recombinant protein for cSAM-MT activity directed toward PCNA (Figure 4). Using the vapor diffusion assay, we were able to detect cSAM-MT activity in the presence of purified recombinant PCNA (Figure 4B). This confirmed that the *C6orf211* gene product was a cSAM-MT, and we designated it Armt1. In addition to the activity observed in the presence of PCNA, significant activity also was observed in the absence of PCNA. Although this was a surprising result, it did support an automethylation func-

tion for Armt1, and it was possible that Armt1 was regulating its activity perhaps by modifying key active site acidic residues (Figure 2). Negative regulation of Armt1 activity by self-methylation was congruent with observations made during initial isolation of the enzyme (Figure 1). In this instance, purification of Armt1 would support automethylation, and this could explain the apparent loss of activity observed with more highly enriched fractions. To investigate Armt1 activity further, we used an alternative assay that detects loss of adenine absorbance resulting from the enzyme-coupled degradation of the by-product of the methyltransferase reaction, SAH. Initially, attempts to detect SAH production with purified Armt1 were unsuccessful (Figure 4C). We then attempted to remove potentially inhibitory methylation on Armt1 prior to assaying.

Compared with most other PTMs, including amine methylation, carboxyl methylation is highly unstable and spontaneously hydrolyzes to an unmodified residue within minutes under basic or physiologic conditions (Kim and Paik, 1976). We exploited this lability and removed the majority of carboxyl methylation by pre-treating Armt1 in a pH 8 solution. To prevent remethylation of the hydrolyzed residues in Armt1, we added the cSAM-MT inhibitor sinefungin. As a result of pretreatment, we consistently observed

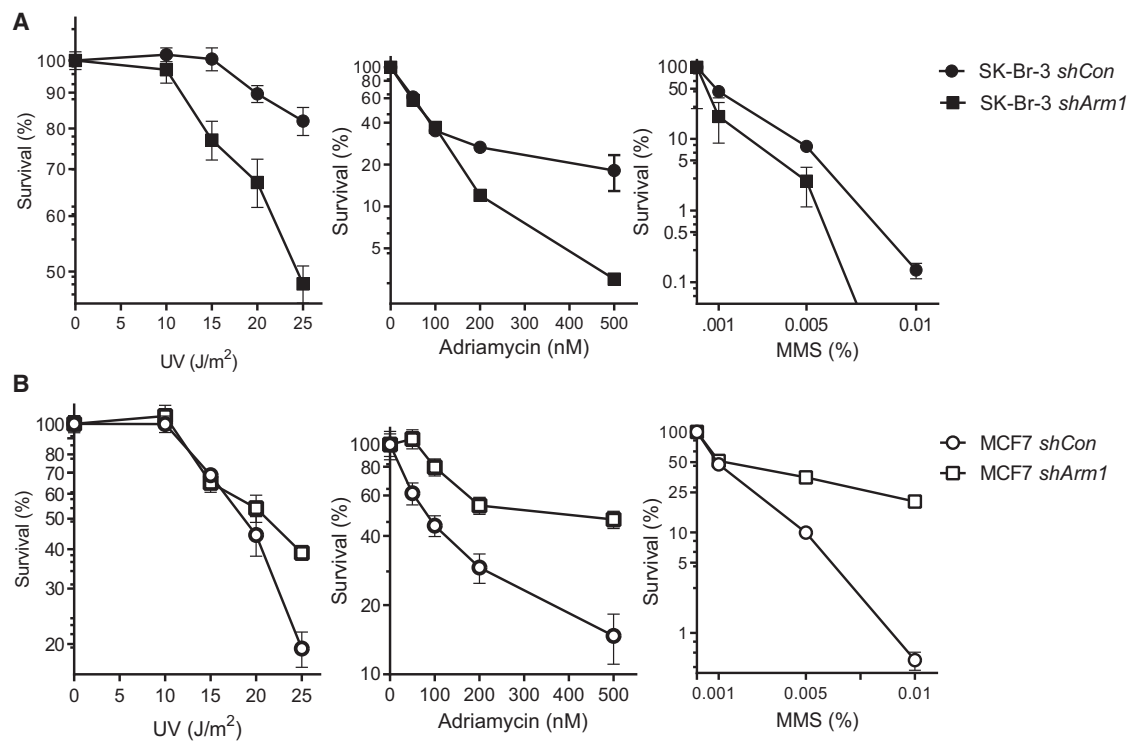

**Figure 5. Armt1 Functions in the DDR**

(A and B) Armt1 differentially regulates survival in SK-Br-3 (A) and MCF7 (B) cells. Cells stably expressing either control (*shCon*) or Armt1 targeting (*shArm1*) shRNA were exposed to DNA damage, and survival was assessed by clonogenic assay. Mean colony numbers from three replicates were normalized to the untreated controls and are presented  $\pm$  SEM.

See also Figure S4.

significant levels of SAM-MT activity above background (Figure 4C). Consistent with the results generated using the vapor diffusion assay, we detected Armt1 automethylation using this assay, but only after pretreatment. These results support the ability of Armt1 to negatively regulate its activity. To confirm PCNA as a target of Armt1, we investigated SAM-MT activity after the addition of increasing amounts of recombinant PCNA (Figure 4D). A dose-dependent increase in activity was observed following addition of PCNA, which further supported it as a substrate of Armt1. Pre-steady-state or burst kinetics were also observed early in these assays (Figure 4E). The burst phase represents enzyme-substrate complex formation, and in the presence of Armt1 alone, the burst phase closely matched enzyme concentration. At the end of the burst phase and when automethylation of Armt1 was near complete, the reaction likely shifted to an equilibrium between enzyme methylation and inhibition followed by spontaneous methylation hydrolysis and enzyme reactivation. A dose-dependent increase in the burst phase also was observed upon addition of the substrate PCNA (Figure 4E). Unlike in the presence of Armt1 alone, where all activity contributes to inhibition of enzymatic activity, methylation of the substrate PCNA would not contribute to enzyme inhibition, resulting in a concentration-dependent increase in the burst phase. Thus, based on the activities observed with the recombinant human protein, we confirm our structural conclusions and identify the DUF89 family member and product of the uncharacterized

human gene *C6orf211* gene as a novel cSAM-MT that methylates both itself and PCNA.

#### Armt1 Regulates the DDR in Breast Cancer Cells

To explore a cellular function for Armt1, we knocked down *C6orf211* gene expression in two breast cancer cell lines with lentiviral shRNA. SK-Br-3 and MCF7 cells stably expressing either nontargeting control (*shCon*) or *C6orf211* targeting shRNA (*shArm1*) were selected, and a 70% reduction in expression was observed in SK-Br-3 cells, and an 85% reduction was observed in MCF7 cells (Figure S4). The SK-Br-3 and MCF7 knockdown cell lines were then assayed for clonogenic survival, and no significant differences in damage-free survival were observed in these cell lines after Armt1 knockdown (data not shown). However, when the knock down cell lines were exposed to different kinds of DNA damage, Armt1 expression significantly affected cell survival (Figure 5). Armt1 knockdown sensitized SK-Br-3 cells to UV, adriamycin (doxorubicin), and methyl methanesulfonate (MMS). SK-Br-3 cells expressing alternative shRNA constructs displayed similar phenotypes discounting off-target effects (Figure S4C). Conversely, reduced Armt1 expression in MCF7 cells generated the opposite phenotype (Figure 5B). In response to UV, adriamycin, and MMS, reduced Armt1 expression produced a damage-resistant phenotype in MCF7 cells, and similar results were observed with other shRNAs (Figure S4D). These results strongly support a role for Armt1 activity,

and likely the methylation of acidic residues in PCNA, in the cellular response to DNA damage. These results also suggest that reduction of Armt1 activity can affect survival by sensitizing some cell types to DNA damage while creating resistance in others. Targeting Armt1 may therefore enhance selective killing of tumor cells with DNA damaging cytotoxic agents.

## DISCUSSION

Here, we provide the original description of Armt1, a first-in-class eukaryotic methyltransferase encoded by the uncharacterized gene *C6orf211*. Structurally, Armt1 belongs to the “DUF89” family, and of the four DUF89 structures that have been determined to date, all possess conserved and strong structural similarities to key active site residues of the SAM-MT fold (Martin and McMillan, 2002). Based on these structural observations, activities for the DUF89 family of proteins have been previously proposed, but these studies lacked biochemical and cellular analyses. For example, in 2010, the structure of the *S. cerevisiae* Armt1 homolog was deposited into the protein databank by a structural genomics group (PDB code: 3PT1). After soaking the crystals with 6-fructophosphate, the depositors found the molecule in the central pocket leading them to postulate it as novel carbohydrate phosphatase. Instead, we observe that the yeast structure belongs to the SAM-MT domain family and readily docks the cofactor SAM (data not shown), and our in-depth characterization of carboxyl methyltransferase activity with the human homolog supports this domain as a SAM-MT fold. In these studies, we not only detected methyltransferase activity in the presence of PCNA, but also in its absence. Self-methylation of Armt1 appears to generate negative feedback that limits its activity.

In addition to enzymatic analyses, the peer-reviewed literature also supports *C6orf211* gene function in processes alternative to metabolism. Mec1ATR-dependent upregulation of the *C6orf211* homolog YMR027W in *S. cerevisiae*, for example, was observed following MMS treatment (Gasch et al., 2001). Yeast Armt1 was also implicated in homologous recombination repair in a study examining spontaneous Rad52 foci formation (Alvaro et al., 2007). In this study, knockouts of YMR027W were among a group of knockout cells that displayed the highest rates of spontaneous Rad52 foci formation indicating either an increase in DNA damage and/or reduction in DNA repair. YMR027W knockout cells actually formed higher Rad52 foci rates than knockouts of the homologous recombination and repair (HRR) protein Rad51 and the RecQ helicase SGS1. Equivalent Rad52 foci formation rates were observed in knockouts of the mismatch repair gene *MLH1* and the DNA repair HRR genes *RAD54* and *RAD57*. Correspondingly, human *C6orf211* has been closely linked to cancer. In breast cancer, *C6orf211* was observed to be tightly coexpressed with *ESR1*, the gene encoding the estrogen receptor (ER) (Dunbier et al., 2011). siRNA knockdown of *C6orf211* expression reduced breast cancer cell proliferation, which was independent of estrogen. *C6orf211* gene expression also positively correlated with proliferation metagene expression in 354 breast tumors. In another study, a small nucleotide polymorphism (SNP) in close proximity to *C6orf211* was identified as a positive indicator of susceptibility to chronic myeloid leukemia (Kim et al., 2011). Here we define the product of *C6orf211* as

a novel protein cSAM-MT that functions in the DDR. We identify that Armt1 modifies PCNA, and we propose that methylation of this essential DNA clamp is, at least in part, responsible for the alterations to survival observed in Armt1 knockdown cells following DNA damage.

The closest previously characterized functional neighbor to Armt1 is the bacterial glutamyl cSAM-MT, CheR. By methylating specific glutamate residues in chemotaxis receptors, CheR modulates intracellular receptor interactions and signal transduction events that cause the bacterium to swim toward nutrients. Methylation of chemotaxis receptors by CheR was found to act as gain control, allowing the bacterium to adapt receptor output across a broad spectrum of ligand concentrations (Levit and Stock, 2002). We have demonstrated that, in addition to methylating the DNA replication and repair factor PCNA, Armt1 functions to regulate the DDR in human cells. Armt1 function in the DDR also depends on cell type, and opposite survival phenotypes were identified in SK-Br-3 and MCF7 cells. The reason for the different survival phenotypes is currently unclear, but the background genetics of these cell lines likely hold the keys to these observations. One important difference between these cells is status p53—an important mediator of the DDR in human cells. MCF7 cells, for example, express WT p53 and can induce expression of responsive genes in the DDR. In contrast, SK-Br-3 cells express mutant p53 that is incapable of inducing gene expression in the DDR (Runnebaum et al., 1991). MCF7 cells also lack the proapoptotic factor caspase 3 (Jänicke et al., 1998), which could alter survival in the DDR. Our functional description of this uncharacterized human gene product as a methyltransferase and its ability to differentially regulate cell survival in the DDR also implicates Armt1 as potentially powerful target for anticancer therapy. Future research will help determine whether modulation of this novel signaling pathway will be of clinical utility in selecting certain tumor cells to cytotoxic therapies.

## EXPERIMENTAL PROCEDURES

### Cell Culture

MCF7, MDA MB468, and SKBr3 cells were obtained from ATCC and maintained in DMEM or McCoy's 5A supplemented with 10% fetal bovine serum (FBS) and antibiotics at 37°C with 5% CO<sub>2</sub>. Cells were exposed to UV-C (254 nm) using a Spectrolinker (Spectronics) and exposed to MMS and Adriamycin (Sigma) at the indicated concentrations for 4 hr. Armt1 was cloned into a baculovirus vector used to infect *T. ni* insect cells (Allele Biotech) at an MOI of 1:3. *T. ni* cells were maintained at 27°C in serum free media (Allele Biotech) and harvested 72 hr after infection.

### Assays

Vapor diffusion assays were carried out basically as described (Murray and Clarke, 1984). Briefly, whole-cell extracts (100 µg) were incubated in the presence of 1.5 µM [<sup>3</sup>H-methyl]-SAM (PerkinElmer) and 7 µM unlabeled SAM (Sigma-Aldrich) in 50 mM Tris buffer (pH 7.5) for 1 hr at 37°C. An equal volume of a 200 mM NaOH and 2% SDS solution was added and mixed and the mixture immediately spotted onto filter paper placed in the neck of a scintillation vial above the fluid. Vials were capped and incubated overnight at room temperature. Volatile <sup>3</sup>H-methanol was measured by scintillation counting (Beckman). The SAM<sup>265</sup> Methyltransferase Assay (GBiosciences) was performed according to the manufacturer's instruction. Briefly, a loss of adenine absorbance resulting from the degradation of SAH was monitored with a microplate reader (BioTek). Clonogenic survival and host cell reactivation assays



were performed as previously described (Koch-Paiz et al., 2004; Birger et al., 2003). Clonogenic assays were performed by exposing the cells to DNA damage followed by seeding onto 6 cm tissue culture dishes in triplicate. Cells were fixed with 70% ethanol after 10–14 days and stained with crystal violet. Colonies with >30 cells were scored.

### Protein Chemistry

Whole-cell extracts were generated with MPer containing protease inhibitor cocktail (Pierce) and 1 mM DTT. Chromatography was performed using a Biologic DuoFlow FPLC (BioRad). MDA MB468 whole-cell extracts were subjected to 30% NH<sub>4</sub>SO<sub>4</sub> precipitation for 2 hr on ice. Precipitates were clarified by centrifugation prior to passage over a 5 ml Phenyl Sepharose HP (HiTrap) column (GE Biosciences) in 20 mM phosphate buffer (pH 7.0). Active fractions were eluted with a linear gradient of NH<sub>4</sub>SO<sub>4</sub> from 30 to 0% in 20 mM phosphate buffer (pH 7.0). Fractions were desalted with Protein Desalting Spin Columns (Pierce) and carboxyl methyltransferase activity assayed using the vapor diffusion assay in the presence of 2 μg of PCNA, as described. Active fractions were combined and separated on a Superdex S200 gel filtration column (GE Biosciences) in 50 mM Tris, 150 mM NaCl, 10% glycerol, and 1 mM DTT (pH 7.5). Active fractions were acetone precipitated prior to 2D PAGE and colloidal Coomassie blue staining (Candiano et al., 2004). SDS-PAGE, 2D PAGE, protein identification, and sequencing were performed as previously described (Hoelz et al., 2006). Recombinant PCNA was expressed as a 6 × His-tagged fusion using a pET303/CT-His (Invitrogen) vector or a calmodulin binding peptide (CBP) fusion using the pDual expression system (Stratagene) and purified with Ni<sup>2+</sup> Sepharose (GE Biosciences) or Calmodulin agarose (Stratagene), respectively.

### SUPPLEMENTAL INFORMATION

Supplemental Information includes four figures and can be found with this article online at <http://dx.doi.org/10.1016/j.celrep.2015.01.054>.

### AUTHOR CONTRIBUTIONS

D.J.H. conceived the project, analyzed, carried out experiments, wrote the manuscript, and provided financial support. J.J.P.P. directed and carried out experiments, analyzed data, wrote the manuscript, and provided financial support. G.B.D. and A.E.A. designed and carried out experiments. L.E.D. carried out experiments and critically reviewed the manuscript. L.H.M. provided scientific advice and supported the research.

### ACKNOWLEDGMENTS

We thank A. Travesa for manuscript review, R. VanBeneden for manuscript review and the generous use of laboratory space, A. Loehrer and M. Diallo for experimental support, T. Kunkel helpful discussions, R. Freund for providing the GST-p21 plasmid, and J. Yates, III for providing the microspray stage designs. This work was supported Eastern Maine Healthcare Systems (D.J.H.), the Maine Cancer Foundation Grant (D.J.H.), generous support from Sue and Joe Cyr from Old Town, ME (D.J.H.), DOD BCRP DAMD17-02-1-0467 (D.J.H.) and DAMD17-99-1-9273 (D.J.H.), USAMRMC W81XWH-10-2-0014 (J. Hock; Project PI: D.J.H.), NIH 5R01CA121289-03 (L.H.M.), and NIH AR059968-03 (J.J.P.P.).

Received: May 19, 2014

Revised: December 8, 2014

Accepted: January 24, 2015

Published: February 26, 2015

### REFERENCES

Alvaro, D., Lisby, M., and Rothstein, R. (2007). Genome-wide analysis of Rad52 foci reveals diverse mechanisms impacting recombination. *PLoS Genet.* 3, e228.  
Birger, Y., West, K.L., Postnikov, Y.V., Lim, J.H., Furusawa, T., Wagner, J.P., Laufer, C.S., Kraemer, K.H., and Bustin, M. (2003). Chromosomal protein

HMG1 enhances the rate of DNA repair in chromatin. *EMBO J.* 22, 1665–1675.

Candiano, G., Bruschi, M., Musante, L., Santucci, L., Ghiggeri, G.M., Carnemolla, B., Orecchia, P., Zardi, L., and Righetti, P.G. (2004). Blue silver: a very sensitive colloidal Coomassie G-250 staining for proteome analysis. *Electrophoresis* 25, 1327–1333.

Djordjevic, S., and Stock, A.M. (1997). Crystal structure of the chemotaxis receptor methyltransferase CheR suggests a conserved structural motif for binding S-adenosylmethionine. *Structure* 5, 545–558.

Dunbier, A.K., Anderson, H., Ghazoui, Z., Lopez-Knowles, E., Pancholi, S., Ribas, R., Drury, S., Sidhu, K., Leary, A., Martin, L.A., and Dowsett, M. (2011). ESR1 is co-expressed with closely adjacent uncharacterised genes spanning a breast cancer susceptibility locus at 6q25.1. *PLoS Genet.* 7, e1001382.

Gasch, A.P., Huang, M., Metzner, S., Botstein, D., Elledge, S.J., and Brown, P.O. (2001). Genomic expression responses to DNA-damaging agents and the regulatory role of the yeast ATR homolog Mec1p. *Mol. Biol. Cell* 12, 2987–3003.

Grillo, M.A., and Colombatto, S. (2005). S-adenosylmethionine and protein methylation. *Amino Acids* 28, 357–362.

Hoegel, C., Pfander, B., Moldovan, G.L., Pyrowolakis, G., and Jentsch, S. (2002). RAD6-dependent DNA repair is linked to modification of PCNA by ubiquitin and SUMO. *Nature* 419, 135–141.

Hoelz, D.J., Arnold, R.J., Dobrolecki, L.E., Abdel-Aziz, W., Loehrer, A.P., Novotny, M.V., Schnaper, L., Hickey, R.J., and Malkas, L.H. (2006). The discovery of labile methyl esters on proliferating cell nuclear antigen by MS/MS. *Proteomics* 6, 4808–4816.

Jänicke, R.U., Sprengart, M.L., Wati, M.R., and Porter, A.G. (1998). Caspase-3 is required for DNA fragmentation and morphological changes associated with apoptosis. *J. Biol. Chem.* 273, 9357–9360.

Kim, S., and Paik, W.K. (1976). Labile protein-methyl ester: comparison between chemically and enzymatically synthesized. *Experientia* 32, 982–984.

Kim, D.H., Lee, S.T., Won, H.H., Kim, S., Kim, M.J., Kim, H.J., Kim, S.H., Kim, J.W., Kim, H.J., Kim, Y.K., et al. (2011). A genome-wide association study identifies novel loci associated with susceptibility to chronic myeloid leukemia. *Blood* 117, 6906–6911.

Koch-Paiz, C.A., Amundson, S.A., Bittner, M.L., Meltzer, P.S., and Fornace, A.J., Jr. (2004). Functional genomics of UV radiation responses in human cells. *Mutation Res.* 549, 65–78.

Lesner, A., Shilpi, R., Ivanova, A., Gawinowicz, M.A., Lesniak, J., Nikolov, D., and Simm, M. (2009). Identification of X-DING-CD4, a new member of human DING protein family that is secreted by HIV-1 resistant CD4(+) T cells and has anti-viral activity. *Biochem. Biophys. Res. Commun.* 389, 284–289.

Levit, M.N., and Stock, J.B. (2002). Receptor methylation controls the magnitude of stimulus-response coupling in bacterial chemotaxis. *J. Biol. Chem.* 277, 36760–36765.

Martin, J.L., and McMillan, F.M. (2002). SAM (dependent) I AM: the S-adenosylmethionine-dependent methyltransferase fold. *Curr. Opin. Struct. Biol.* 12, 783–793.

Moldovan, G.L., Pfander, B., and Jentsch, S. (2007). PCNA, the maestro of the replication fork. *Cell* 129, 665–679.

Murray, E.D., Jr., and Clarke, S. (1984). Synthetic peptide substrates for the erythrocyte protein carboxyl methyltransferase. Detection of a new site of methylation at isomerized L-aspartyl residues. *J. Biol. Chem.* 259, 10722–10732.

Runnebaum, I.B., Nagarajan, M., Bowman, M., Soto, D., and Sukumar, S. (1991). Mutations in p53 as potential molecular markers for human breast cancer. *Proc. Natl. Acad. Sci. USA* 88, 10657–10661.

Schubert, H.L., Blumenthal, R.M., and Cheng, X. (2003). Many paths to methyltransferase: a chronicle of convergence. *Trends Biochem. Sci.* 28, 329–335.

Sprung, R., Chen, Y., Zhang, K., Cheng, D., Zhang, T., Peng, J., and Zhao, Y. (2008). Identification and validation of eukaryotic aspartate and glutamate methylation in proteins. *J. Proteome Res.* 7, 1001–1006.

- Stanevich, V., Jiang, L., Satyshur, K.A., Li, Y., Jeffrey, P.D., Li, Z., Menden, P., Semmelhack, M.F., and Xing, Y. (2011). The structural basis for tight control of PP2A methylation and function by LCMT-1. *Mol. Cell* **41**, 331–342.
- Stelter, P., and Ulrich, H.D. (2003). Control of spontaneous and damage-induced mutagenesis by SUMO and ubiquitin conjugation. *Nature* **425**, 188–191.
- Stoimenov, I., and Helleday, T. (2009). PCNA on the crossroad of cancer. *Biochem. Soc. Trans.* **37**, 605–613.
- Wang, S.C., Nakajima, Y., Yu, Y.L., Xia, W., Chen, C.T., Yang, C.C., McIntush, E.W., Li, L.Y., Hawke, D.H., Kobayashi, R., and Hung, M.C. (2006). Tyrosine phosphorylation controls PCNA function through protein stability. *Nat. Cell Biol.* **8**, 1359–1368.
- Waters, L.S., Minesinger, B.K., Wiltrout, M.E., D'Souza, S., Woodruff, R.V., and Walker, G.C. (2009). Eukaryotic translesion polymerases and their roles and regulation in DNA damage tolerance. *Microbiol. Mol. Biol. Rev.* **73**, 134–154.
- Xie, H., and Clarke, S. (1993). Methyl esterification of C-terminal leucine residues in cytosolic 36-kDa polypeptides of bovine brain. A novel eucaryotic protein carboxyl methylation reaction. *J. Biol. Chem.* **268**, 13364–13371.
- Yang, J., Kulkarni, K., Manolaridis, I., Zhang, Z., Dodd, R.B., Mas-Droux, C., and Barford, D. (2011). Mechanism of isoprenylcysteine carboxyl methylation from the crystal structure of the integral membrane methyltransferase ICMT. *Mol. Cell* **44**, 997–1004.
- Zhang, Y. (2008). I-TASSER server for protein 3D structure prediction. *BMC Bioinformatics* **9**, 40.

Cell Reports

Supplemental Information

**Human *C6orf211* Encodes Armt1, a Protein  
Carboxyl Methyltransferase that Targets PCNA  
and Is Linked to the DNA Damage Response**

J. Jefferson P. Perry, Gregory D. Ballard, Alexandra E. Albert, Lacey E. Dobrolecki,  
Linda H. Malkas, and Derek J. Hoelz









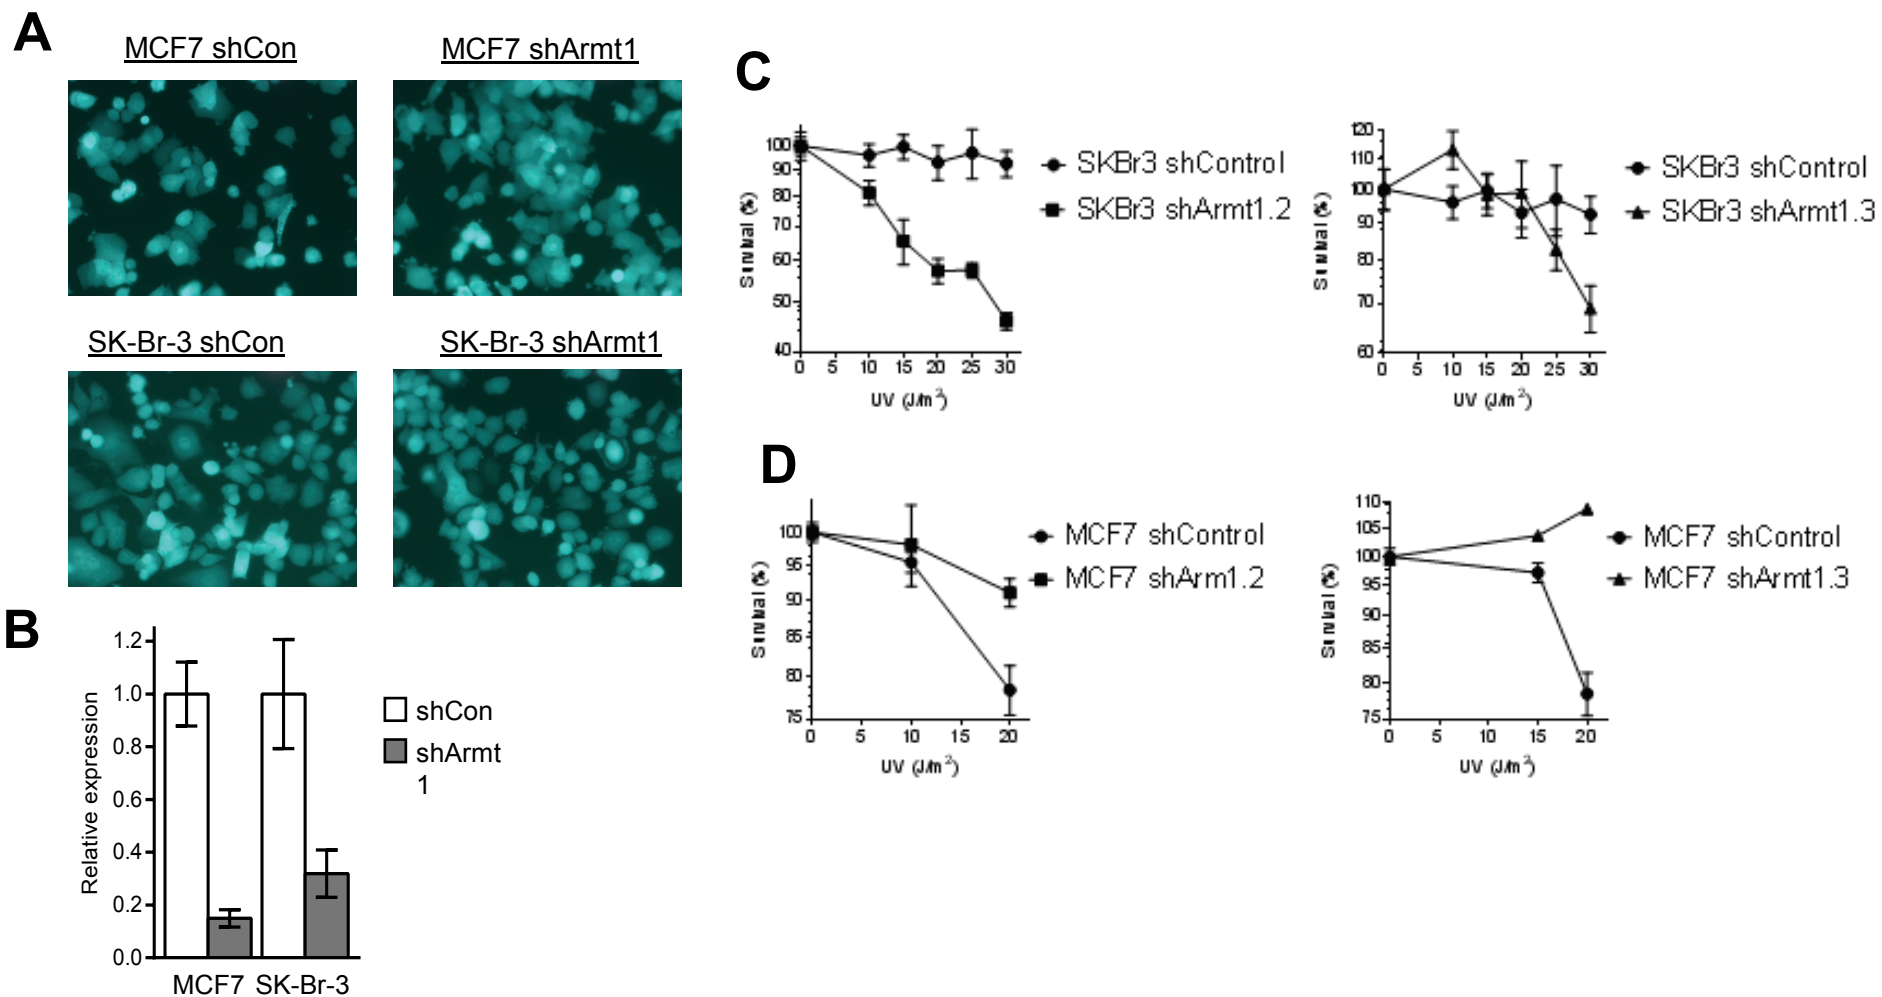

Figure S4 (related to Figure 5). (A) MCF7 and SK-Br-3 cells were infected with lentiviral particles expressing shRNA and TurboGFP from a bicistronic promoter, and stable clones selected with puromycin. Expression of TurboGFP was confirmed by microscopy. (B) Armt1 expression levels were determined by Q-PCR. Average mRNA expression levels were normalized to non-targeting controls and are presented  $\pm$  SD. MCF7 and SK-Br-3 cells were infected with lentiviral particles and clones stably expressing two alternative shRNA constructs (shArmt1.2, or shArmt1.3) were selected. SK-Br-3 cells (C) and MCF7 cells (D) expressing either control or Armt1 knockdown shRNA were exposed to increasing doses of UV radiation and survival assessed by clonogenic assays. Average colony numbers were normalized to the non-irradiated controls and are presented  $\pm$  SEM.
